# Supplementary material for: Molybdenum phosphide: a new highly efficient catalyst for the electrochemical hydrogen evolution reaction
Source: Royal Society of Chemistry journal article supplement (doi:10.1039/c4cc05936k), 2014-08-11
Supplement: c4cc05936k1.pdf [file c4cc05936k1.pdf]

## Electronic Supplementary Information for

### **Molybdenum phosphide: A new highly efficient catalyst for the electrochemical hydrogen evolution reaction**

Xiaobo Chen<sup>a</sup>, Dezhi Wang<sup>a,b</sup>, Zhiping Wang<sup>a</sup>, Pan Zhou<sup>a</sup>, Zhuangzhi Wu<sup>a,b\*</sup>, Feng Jiang<sup>a, b\*</sup>

<sup>a</sup> *School of Materials Science and Engineering, Central South University, Changsha 410083, PR China,*

<sup>b</sup> *Key Laboratory of Ministry of Education for Non-ferrous Materials Science and Engineering, Central South University, Changsha 410083, PR China*

*Tel: +86 0731-88877221 Email: [zwu2012@csu.edu.cn](mailto:zwu2012@csu.edu.cn)*

## 1. Experimental

### 1.1 Catalyst preparation

The metal phosphide catalysts were prepared from precursor salts via a temperature programmed reduction (TPR) method. For the unsupported MoP and Ni<sub>2</sub>P, the corresponding metal salt (2.472 g of (NH<sub>4</sub>)<sub>6</sub>Mo<sub>7</sub>O<sub>24</sub> • 4H<sub>2</sub>O, or 8.148 g of Ni(NO<sub>3</sub>)<sub>2</sub> • 6H<sub>2</sub>O) and a corresponding amount of diammonium hydrogen phosphate ((NH<sub>4</sub>)<sub>2</sub>HPO<sub>4</sub>) was added into 30 ml distilled water, to yield a P/Mo molar ratio of 1/1, or a P/Ni molar ratio of 2/1. The precursor solution was aged in a covered beaker in a water bath at 353 K for 24 h, dried at 393 K and calcined at 773 K for 4 h. The calcined catalyst precursor was ground to powder and converted to the active metal phosphide by TPR in H<sub>2</sub> at a flow rate of 160 ml (STP)/min. A heating rate of 10 K/min to 573 K, followed by a heating rate of 2 K/min to 923 K was used during the TPR, with the final temperature held for 3 h. The catalyst was then cooled to room temperature in Ar. Commercial MoS<sub>2</sub> particles purchased from the JDC company of China was also selected as a comparison sample, marked as C-MoS<sub>2</sub>.

### 1.2 Characterizations

XRD patterns were recorded using D/max-2500 system with a Cu K $\alpha$  irradiation source ( $\lambda=0.154$  nm). Scanning electron microscopy (SEM) images were obtained with a FEI Sirion 200 microscope. Transmission electron microscopy (TEM) studies were performed on a Tecnai G<sup>2</sup> 20 microscopy operating at 200 keV. BET surface areas were measured by N<sub>2</sub> adsorption at 77 K using a volumetric unit (MicromeriticsFlowsorb II 2300).

### 1.3 Preparation of electrodes and electrochemical characterization

1 mg catalyst and 80  $\mu$ L Nafion solution (5 wt.%) were dispersed in 1 mL of a solution composed of 4:1 (v/v) distilled water and ethanol. After sonication for 30 mins, 5  $\mu$ L of the catalyst slurry was dropped on the surface of a GCE (glassy carbon electrode) (3 mm in diameter). Subsequently, the GCE was left to dry at room temperature. Each electrode was prepared with a loading of approximately 71  $\mu$ g/cm<sup>2</sup>.

The electrochemical measurements were carried out in a standard three-electrode setup. The electrocatalytic activity was examined through linear sweep voltammetry with a scan rate

of 2 mV/s in 0.5 M H<sub>2</sub>SO<sub>4</sub> at room temperature using CHI 660E (Chenhua, China), and stable polarization curves were recorded after 20 cycles with a standard deviation within 5%. A saturated calomel electrode (SCE) was employed as the reference electrode and a Pt foil as the counter electrode. Electrode potentials were recorded vs SCE reference electrode, which was calibrated with respect to reversible hydrogen electrode (RHE).
